# Supplementary material for: Sleep in the Natural Environment: A Pilot Study
Source: PubMed Central journal article supplement (PMC7085707; doi:10.3390/s20051378), 2020-03-03
Supplement: sensors-20-01378-s001.pdf [file sensors-20-01378-s001.pdf]

## Supplementary Materials

### Sleep in the Natural Environment: A Pilot Study

**Fayzan F. Chaudhry<sup>1,2+</sup>, Matteo Danieletto<sup>1,2,3+</sup>, Eddy Golden<sup>1,2,3</sup>, Jerome Scelza<sup>2,3</sup>, Greg Botwin<sup>2,3</sup>, Mark Shervey<sup>2,3</sup>, Jessica K. De Freitas<sup>1,2,3</sup>, Ishan Paranjpe<sup>1</sup>, Girish N. Nadkarni<sup>1,4,5</sup>, Riccardo Miotto<sup>1,2,3</sup>, Patricia Glowe<sup>1,2,3</sup>, Greg Stock<sup>3</sup>, Bethany Percha<sup>2,3</sup>, Noah Zimmerman<sup>2,3</sup>, Joel T. Dudley<sup>2,3\*</sup>, Benjamin S. Glicksberg<sup>1,2,3\*</sup>**

<sup>1</sup> Hasso Plattner Institute for Digital Health at Mount Sinai, Icahn School of Medicine at Mount Sinai, New York, NY, 10032, USA.

<sup>2</sup> Department of Genetics and Genomic Sciences, Icahn School of Medicine at Mount Sinai, New York, NY, 10032, USA

<sup>3</sup> Institute for Next Generation Healthcare, Icahn School of Medicine at Mount Sinai, New York, NY, 10032, USA.

<sup>4</sup> The Charles Bronfman Institute for Personalized Medicine, Icahn School of Medicine at Mount Sinai, New York, New York.

<sup>5</sup> Department of Medicine, Icahn School of Medicine at Mount Sinai, New York, New York.

+ Authors contributed equally

\* Correspondence: joel.dudley@mssm.edu or benjamin.glicksberg@mssm.edu

S1: Demographic questionnaire

## Demographics

1. Assigned Study Identification Number:

2. What is your biological sex?

Male

Female

3. Are you Spanish, Hispanic, or Latino?

No

Yes

4. What is your race? (Mark all that apply)

White

Black/African American

American Indian/Alaska Native

Asian

Native Hawaiian or Other Pacific Islander

Other (please specify)

5. What is the highest level of education you have completed?

6. What is your height in inches?

7. What is your weight in lbs?

8. What is your neck collar size in cms?

9. What best describes your current main daily activities?

- Working full time (day shifts)
- Working full time (rotating or night shifts)
- Working part time (day shifts)
- Working part time (rotating or night shifts)
- Unemployed, looking for work
- In school
- Stay at home parent
- Retired
- Disabled
- Prefer not to answer

10. Thinking about the past 3 months, which of the following best describes your work schedule

- Regular day shifts
- Regular evening shifts
- Regular night shifts (9pm to 8am)
- Rotating shifts (one that changes periodically from days, evening or nights)
- Split shifts (one consisting of two distinct periods each day)
- An irregular schedule
- Prefer not to answer

11. Do you have flexible work hours that allow you to vary or make changes in the time you begin and end work?

- Yes
- No
- Prefer not to answer

36-Item Short Form Survey Instrument (Page 1)

**Instructions:** This questionnaire asks you about your general health. Please attempt to answer every question. If you are unsure about how to answer a question, please give the best answer you can. You do not have to answer any question you feel uncomfortable answering.

2. In general, would you say your health is:

Excellent  Very good  Good  Fair  Poor

3. Compared to one year ago, how would you rate your health in general now?

Much better now than one year ago  Somewhat better now than one year ago  About the same  Somewhat worse now than one year ago  Much worse now than one year ago

36-Item Short Form Survey Instrument (Page 2)

The following items are about activities you might do during atypical day. Does your health now limit you in these activities? If so, how much?

4. Vigorous activities, such as running, lifting heavy objects, participating in strenuous sports

Yes, Limited a Lot  Yes, Limited a Little  No, Not Limited at All

5. Moderate activities, such as moving a table, pushing a vacuum cleaner, bowling or playing golf

Yes, Limited a Lot  Yes, Limited a Little  No, Not Limited at All

6. Lifting or carrying groceries

Yes, Limited a Lot  Yes, Limited a Little  No, Not Limited at All

7. Climbing several flights of stairs

Yes, Limited a Lot  Yes, Limited a Little  No, Not Limited at All

8. Climbing one flight of stairs

Yes, Limited a Lot  Yes, Limited a Little  No, Not Limited at All

9. Bending, kneeling, or stooping

Yes, Limited a Lot  Yes, Limited a Little  No, Not Limited at All

10. Walking more than a mile

Yes, Limited a Lot  Yes, Limited a Little  No, Not Limited at All

11. Walking several blocks

Yes, Limited a Lot  Yes, Limited a Little  No, Not Limited at All

12. Walking one block

Yes, Limited a Lot  Yes, Limited a Little  No, Not Limited at All

13. Bathing or dressing yourself

Yes, Limited a Lot  Yes, Limited a Little  No, Not Limited at All

Medical Outcomes Study: 36-Item Short Form Survey Instrument (Page 3)

**During the past 4 weeks, have you had any of the following problems with your work or other regular daily activities as a result of your physical health?**

14. Cut down the amount of time you spent on work or other activities

Yes  No

15. Accomplished less than you would like

Yes  No

16. Were limited in the kind of work or other activities

Yes  No

17. Had difficulty performing the work or other activities (for example, it took extra effort)

Yes  No

36-Item Short Form Survey Instrument (Page 4)

During the past 4 weeks, have you had any of the following problems with your work or other regular daily activities as a result of any emotional problems (such as feeling depressed or anxious)?

18. Cut down the amount of time you spent on work or other activities

Yes

No

19. Accomplished less than you would like

Yes

No

20. Didn't do work or other activities as carefully as usual

Yes

No

Medical Outcomes Study: 36-Item Short Form Survey Instrument (Page 5)

21. During the past 4 weeks, to what extent has your physical health or emotional problems interfered with your normal social activities with family, friends, neighbors, or groups?

Not at all

Slightly

Moderately

Quite a bit

Extremely

22. How much bodily pain have you had during the past 4 weeks?

None

Very mild

Mild

Moderate

Severe

Very Severe

23. During the past 4 weeks, how much did pain interfere with your normal work (including both work outside the home and housework)?

Not at all

A little bit

Moderately

Quite a bit

Extremely

36-Item Short Form Survey Instrument (Page 6)

These questions are about how you feel and how things have been with you during the past 4 weeks. For each question, please give the one answer that comes closest to the way you have been feeling.

How much of the time during the past 4 weeks . . .

24. Did you feel full of pep?

All of the Time    Most of the Time    A Good Bit of the Time    Some of the Time    A Little of the Time    None of the Time

                  

25. Have you been a very nervous person?

All of the Time    Most of the Time    A Good Bit of the Time    Some of the Time    A Little of the Time    None of the Time

                  

26. Have you felt so down in the dumps that nothing could cheer you up?

All of the Time    Most of the Time    A Good Bit of the Time    Some of the Time    A Little of the Time    None of the Time

                  

27. Have you felt calm and peaceful?

All of the Time    Most of the Time    A Good Bit of the Time    Some of the Time    A Little of the Time    None of the Time

                  

28. Did you have a lot of energy?

All of the Time    Most of the Time    A Good Bit of the Time    Some of the Time    A Little of the Time    None of the Time

                  

29. Have you felt downhearted and blue?

All of the Time    Most of the Time    A Good Bit of the Time    Some of the Time    A Little of the Time    None of the Time

                  

30. Did you feel worn out?

All of the Time    Most of the Time    A Good Bit of the Time    Some of the Time    A Little of the Time    None of the Time

                  

31. Have you been a happy person?

All of the Time    Most of the Time    A Good Bit of the Time    Some of the Time    A Little of the Time    None of the Time

                  

32. Did you feel tired?

All of the Time    Most of the Time    A Good Bit of the Time    Some of the Time    A Little of the Time    None of the Time

36-Item Short Form Survey Instrument (Page 7)

33. During the past 4 weeks, how much of the time has your physical health or emotional problems interfered with your social activities (like visiting with friends, relatives, etc.)?

All of the time      Most of the time      Some of the time      A little of the time      None of the time

                      

36-Item Short Form Survey Instrument (Page 8)

How TRUE or FALSE is each of the following statements for you.

34. I seem to get sick a little easier than other people

Definitely True      Mostly True      Don't Know      Mostly False      Definitely False

                      

35. I am as healthy as anybody I know

Definitely True      Mostly True      Don't Know      Mostly False      Definitely False

                      

36. I expect my health to get worse

Definitely True      Mostly True      Don't Know      Mostly False      Definitely False

                      

37. My health is excellent

Definitely True      Mostly True      Don't Know      Mostly False      Definitely False



S3: MEQ questionnaire

**MORNINGNESS-EVENINGNESS QUESTIONNAIRE (MEQ)**

**Instructions: This questionnaire asks you about when you feel the most alert. Please attempt to answer every question. If you are unsure about how to answer a question, please give the best answer you can. You do not have to answer any question you feel uncomfortable answering. Each question should be answered independently of others. Do NOT go back and check your answers.**

38. Approximately what time would you get up if you were entirely free to plan your day?

|                                    |                                    |                                    |                                     |                                     |                                    |
|------------------------------------|------------------------------------|------------------------------------|-------------------------------------|-------------------------------------|------------------------------------|
| 5:00 AM-6:30 AM<br>(05:00-06:30 h) | 6:30 AM-7:45 AM<br>(06:30-07:45 h) | 7:45 AM-9:45 AM<br>(07:45-09:45 h) | 9:45 AM-11:00 AM<br>(09:45-11:00 h) | 11:00 AM-12 noon<br>(11:00-12:00 h) | 12 noon-5:00 AM<br>(12:00-05:00 h) |
| <input type="radio"/>              | <input type="radio"/>              | <input type="radio"/>              | <input type="radio"/>               | <input type="radio"/>               | <input type="radio"/>              |

39. Approximately what time would you go to bed if you were entirely free to plan your evening?

|                                    |                                     |                                      |                                     |                                    |                                    |
|------------------------------------|-------------------------------------|--------------------------------------|-------------------------------------|------------------------------------|------------------------------------|
| 8:00 PM-9:00 PM<br>(20:00-21:00 h) | 9:00 PM-10:15 PM<br>(21:00-22:15 h) | 10:15 PM-12:30 AM<br>(22:15-00:30 h) | 12:30 AM-1:45 AM<br>(00:30-01:45 h) | 1:45 AM-3:00 AM<br>(01:45-03:00 h) | 3:00 AM-8:00 PM<br>(03:00-20:00 h) |
| <input type="radio"/>              | <input type="radio"/>               | <input type="radio"/>                | <input type="radio"/>               | <input type="radio"/>              | <input type="radio"/>              |

40. If you usually have to get up at a specific time in the morning, how much do you depend on an alarm clock?

|                       |                       |                       |                       |
|-----------------------|-----------------------|-----------------------|-----------------------|
| Not at all            | Slightly              | Somewhat              | Very much             |
| <input type="radio"/> | <input type="radio"/> | <input type="radio"/> | <input type="radio"/> |

41. How easy do you find it to get up in the morning (when you are not awakened unexpectedly)?

|                       |                       |                       |                       |
|-----------------------|-----------------------|-----------------------|-----------------------|
| Very difficult        | Somewhat difficult    | Fairly easy           | Very easy             |
| <input type="radio"/> | <input type="radio"/> | <input type="radio"/> | <input type="radio"/> |

42. How alert do you feel during the first half hour after you wake up in the morning?

|                       |                       |                       |                       |
|-----------------------|-----------------------|-----------------------|-----------------------|
| Not at all alert      | Slightly alert        | Fairly alert          | Very alert            |
| <input type="radio"/> | <input type="radio"/> | <input type="radio"/> | <input type="radio"/> |

43. How hungry do you feel during the first half hour after you wake up?

|                       |                       |                       |                       |
|-----------------------|-----------------------|-----------------------|-----------------------|
| Not at all hungry     | Slightly hungry       | Fairly hungry         | Very hungry           |
| <input type="radio"/> | <input type="radio"/> | <input type="radio"/> | <input type="radio"/> |

44. During the first half hour after you wake up in the morning, how do you feel?

|                       |                       |                       |                       |
|-----------------------|-----------------------|-----------------------|-----------------------|
| Very tired            | Fairly tired          | Fairly refreshed      | Very refreshed        |
| <input type="radio"/> | <input type="radio"/> | <input type="radio"/> | <input type="radio"/> |

45. If you had no commitments the next day, what time would you go to bed compared to your usual bedtime?

|                       |                        |                       |                         |
|-----------------------|------------------------|-----------------------|-------------------------|
| Seldom or never later | Less than 1 hour later | 1-2 hours later       | More than 2 hours later |
| <input type="radio"/> | <input type="radio"/>  | <input type="radio"/> | <input type="radio"/>   |

46. You have decided to do physical exercise. A friend suggests that you do this for one hour twice a week, and the best time for him is between 7-8 AM (07-08 h). Bearing in mind nothing but your own internal "clock," how do you think you would perform?

|                       |                             |                         |                              |
|-----------------------|-----------------------------|-------------------------|------------------------------|
| Would be in good form | Would be in reasonable form | Would find it difficult | Would find it very difficult |
| <input type="radio"/> | <input type="radio"/>       | <input type="radio"/>   | <input type="radio"/>        |

47. At approximately what time in the evening do you feel tired, and, as a result, in need of sleep?

|                                    |                                     |                                      |                                     |                                    |
|------------------------------------|-------------------------------------|--------------------------------------|-------------------------------------|------------------------------------|
| 8:00 PM-9:00 PM<br>(20:00-21:00 h) | 9:00 PM-10:15 PM<br>(21:00-22:15 h) | 10:15 PM-12:45 AM<br>(22:15-00:45 h) | 12:45 AM-2:00 AM<br>(00:45-02:00 h) | 2:00 AM-3:00 AM<br>(02:00-03:00 h) |
| <input type="radio"/>              | <input type="radio"/>               | <input type="radio"/>                | <input type="radio"/>               | <input type="radio"/>              |

48. You want to be at your peak performance for a test that you know is going to be mentally exhausting and will last two hours. You are entirely free to plan your day. Considering only your "internal clock," which one of the four testing times would you choose?

|                       |                       |                       |                       |
|-----------------------|-----------------------|-----------------------|-----------------------|
| 8 AM-10 AM (08-10 h)  | 11 AM-1 PM (11-13 h)  | 3 PM-5 PM (15-17 h)   | 7 PM-9 PM (19-21 h)   |
| <input type="radio"/> | <input type="radio"/> | <input type="radio"/> | <input type="radio"/> |

49. If you got into bed at 11 PM (23 h), how tired would you be?

|                       |                       |                       |                       |
|-----------------------|-----------------------|-----------------------|-----------------------|
| Not at all tired      | A little tired        | Fairly tired          | Very tired            |
| <input type="radio"/> | <input type="radio"/> | <input type="radio"/> | <input type="radio"/> |

50. For some reason you have gone to bed several hours later than usual, but there is no need to get up at any particular time the next morning. Which one of the following are you most likely to do?

|                                                            |                                                     |                                                        |                                         |
|------------------------------------------------------------|-----------------------------------------------------|--------------------------------------------------------|-----------------------------------------|
| Will wake up at usual time, but will not fall asleep again | Will wake up at usual time and will doze thereafter | Will wake up at usual time, but will fall asleep again | Will not wake up until later than usual |
| <input type="radio"/>                                      | <input type="radio"/>                               | <input type="radio"/>                                  | <input type="radio"/>                   |

51. One night you have to remain awake between 4-6 AM (04-06 h) in order to carry out a night watch. You have no time commitments the next day. Which one of the alternatives would suit you best?

Would not go to bed until the watch is over      Would take a nap before and sleep after      Would take a good sleep before and nap after      Would sleep only before the watch

                

52. You have two hours of hard physical work. You are entirely free to plan your day. Considering only your internal "clock," which of the following times would you choose?

8 AM–10 AM (08–10 h)      11 AM–1 PM (11–13 h)      3 PM–5 PM (15–17 h)      7 PM–9 PM (19–21 h)

                

53. You have decided to do physical exercise. A friend suggests that you do this for one hour twice a week. The best time for her is between 10-11 PM (22-23 h). Bearing in mind only your internal "clock," how well do you think you would perform?

Would be in good form      Would be in reasonable form      Would find it difficult      Would find it very difficult

                

54. Suppose you can choose your own work hours. Assume that you work a five-hour day (including breaks), your job is interesting, and you are paid based on your performance. At approximately what time would you choose to begin?

5 hours starting between 4–8 AM (05–08 h)      5 hours starting between 8–9 AM (08–09 h)      5 hours starting between 9 AM–2 PM (09–14 h)      5 hours starting between 2–5 PM (14–17 h)      5 hours starting between 5 PM–4 AM (17–04 h)

                      

55. At approximately what time of day do you usually feel your best?

5–8 AM (05–08 h)      8–10 AM (08–10 h)      10 AM–5 PM (10–17 h)      5–10 PM (17–22 h)      10 PM–5 AM (22–05 h)

                      

56. One hears about "morning types" and "evening types." Which one of these types do you consider yourself to be?

Definitely a morning type      Rather more a morning type than an evening type      Rather more an evening type than a morning type      Definitely an evening type

                

S4: PSQI questionnaire

### The Pittsburgh Sleep Quality Index (PSQI)

**Instructions:** This questionnaire asks you about your sleep quality. Please attempt to answer every question. You do not have to answer any question you feel uncomfortable answering. Your answers should indicate the most accurate reply for the majority of days and nights in the **past month**. During the **past month**,

63. When have you usually gone to bed?

Time                      hh      mm      AM/PM  
                                  :  -

64. How long (in minutes) has it taken you to fall asleep each night?

65. When have you usually gotten up in the morning?

Time                      hh      mm      AM/PM  
                                  :  -

66. How many hours of actual sleep do you get at night? (This may be different than the number of hours you spend in bed)

67. During the past month, how often have you had trouble sleeping because you...

|                                                     | Not during the past month | Less than once a week | Once or twice a week  | Three or more times a week |
|-----------------------------------------------------|---------------------------|-----------------------|-----------------------|----------------------------|
| Cannot get to sleep within 30 minutes               | <input type="radio"/>     | <input type="radio"/> | <input type="radio"/> | <input type="radio"/>      |
| Wake up in the middle of the night or early morning | <input type="radio"/>     | <input type="radio"/> | <input type="radio"/> | <input type="radio"/>      |
| Have to get up to use the bathroom                  | <input type="radio"/>     | <input type="radio"/> | <input type="radio"/> | <input type="radio"/>      |
| Cannot breathe comfortably                          | <input type="radio"/>     | <input type="radio"/> | <input type="radio"/> | <input type="radio"/>      |
| Cough or snore loudly                               | <input type="radio"/>     | <input type="radio"/> | <input type="radio"/> | <input type="radio"/>      |
| Feel too cold                                       | <input type="radio"/>     | <input type="radio"/> | <input type="radio"/> | <input type="radio"/>      |
| Feel too hot                                        | <input type="radio"/>     | <input type="radio"/> | <input type="radio"/> | <input type="radio"/>      |
| Have bad dreams                                     | <input type="radio"/>     | <input type="radio"/> | <input type="radio"/> | <input type="radio"/>      |
| Have pain                                           | <input type="radio"/>     | <input type="radio"/> | <input type="radio"/> | <input type="radio"/>      |
| Other reason(s)                                     | <input type="radio"/>     | <input type="radio"/> | <input type="radio"/> | <input type="radio"/>      |

68. During the past month, how often have you taken medicine (prescribed or “over the counter”) to help you sleep?

| Not during the past month | Less than once a week | Once or twice a week  | Three or more times a week |
|---------------------------|-----------------------|-----------------------|----------------------------|
| <input type="radio"/>     | <input type="radio"/> | <input type="radio"/> | <input type="radio"/>      |

69. During the past month, how often have you had trouble staying awake while driving, eating meals, or engaging in social activity?

| Not during the past month | Less than once a week | Once or twice a week  | Three or more times a week |
|---------------------------|-----------------------|-----------------------|----------------------------|
| <input type="radio"/>     | <input type="radio"/> | <input type="radio"/> | <input type="radio"/>      |

70. During the past month, how much of a problem has it been for you to keep up enthusiasm to get things done?

| Not during the past month | Less than once a week | Once or twice a week  | Three or more times a week |
|---------------------------|-----------------------|-----------------------|----------------------------|
| <input type="radio"/>     | <input type="radio"/> | <input type="radio"/> | <input type="radio"/>      |

71. During the past month, how would you rate your sleep quality overall?

| Very good             | Fairly good           | Fairly bad            | Very bad              |
|-----------------------|-----------------------|-----------------------|-----------------------|
| <input type="radio"/> | <input type="radio"/> | <input type="radio"/> | <input type="radio"/> |

S5: Results table of all correlation analyses

|                      |          | Correlation analysis P-values |              |             |              |              |
|----------------------|----------|-------------------------------|--------------|-------------|--------------|--------------|
| Metric               | Device   | Fitbit                        | Hexoskin     | SRSM        | Withings     | Oura         |
| TSD                  | Fitbit   | —                             | 5.12e-13***  | 7.67e-09*** | 1.17e-12***  | 3.87e-07***  |
|                      | Hexoskin | 5.12e-13***                   | —            | 5.12e-09*** | 3.78e-12***  | 3.68e-04***  |
|                      | SRSM     | 7.67e-09***                   | 5.12e-09***  | —           | 1.16e-08***  | 3.55e-03***  |
|                      | Withings | 1.17e-12***                   | 3.78e-12***  | 1.16e-08*** | —            | 7.94e-07***  |
|                      | Oura     | 3.87e-07***                   | 3.68e-04***  | 3.55e-03*** | 7.94e-07***  | —            |
| REM                  | Hexoskin | —                             | —            | —           | 1.98e-04***  | 1.24e-02**   |
|                      | Withings | —                             | 1.98e-04***  | —           | —            | 1.06e-06***  |
|                      | Oura     | —                             | 1.24e-02**   | —           | 1.06e-06***  | —            |
| Overall Sleep Stages | Hexoskin | —                             | —            | —           | <2.20e-16*** | <2.20e-16*** |
|                      | Withings | —                             | <2.20e-16*** | —           | —            | <2.20e-16*** |
|                      | Oura     | —                             | <2.20e-16*** | —           | <2.20e-16*** | —            |

Note: \* P < 0.1; \*\* P < 0.05; \*\*\* P < 0.01; TSD refers to total sleep duration; REM refers to rapid eye movement sleep stage; SRSM refers to self-reported sleep metrics. Note that the results from the Kendall's rank correlation test returned P values below the threshold of reporting in the R programming language and thus were reported as less than the threshold returned in the test outputs.

S6: Univariate analyses comparing morning cognitive scores to device data

|          |            | Morning Cognitive Scores |            |         |                |
|----------|------------|--------------------------|------------|---------|----------------|
| Device   | Feature    | Coefficient              | Std. Error | P-Value | R <sup>2</sup> |
| Fitbit   | TSD        | -0.003                   | 0.014      | 0.825   | 0.004          |
|          | Wakeups    | -0.018                   | 0.018      | 0.329   | 0.068          |
| Withings | TSD        | -0.018                   | 0.010      | 0.110   | 0.172          |
|          | Latency    | .015                     | 0.091      | 0.869   | 0.002          |
|          | Efficiency | -0.001                   | 0.001      | 0.315   | 0.072          |
|          | Wakeups    | .001                     | 0.001      | 0.888   | 0.001          |

|              |            |        |        |       |       |
|--------------|------------|--------|--------|-------|-------|
|              | REM        | -0.039 | 0.040  | 0.342 | 0.065 |
| Oura         | TSD        | -0.022 | 0.019  | 0.265 | 0.088 |
|              | Latency    | -0.105 | 0.113  | 0.366 | 0.059 |
|              | Efficiency | 0.002  | 0.002  | 0.285 | 0.081 |
|              | Wakeups    | -0.018 | 0.014  | 0.226 | 0.103 |
|              | REM        | -0.008 | 0.0173 | 0.656 | 0.015 |
| Hexoskin     | TSD        | -0.020 | 0.015  | 0.206 | 0.112 |
|              | Latency    | -0.001 | 0.096  | 0.995 | 0.000 |
|              | Efficiency | 0.003  | 0.005  | 0.530 | 0.029 |
|              | REM        | -0.071 | 0.044  | 0.128 | 0.158 |
| SRSM         | TSD        | -0.005 | 0.014  | 0.725 | 0.009 |
|              | Latency    | -0.008 | 0.091  | 0.935 | 0.000 |
| Observations |            | 16     |        |       |       |

Note: \*  $P < 0.1$ ; \*\*  $P < 0.05$ ; \*\*\*  $P < 0.01$ ; SRSM refers to self-reported sleep metrics.

S7: Univariate analyses comparing afternoon cognitive scores to device data

|              |            | Afternoon Cognitive Scores |            |          |                |
|--------------|------------|----------------------------|------------|----------|----------------|
| Device       | Feature    | Coefficient                | Std. Error | P-Value  | R <sup>2</sup> |
| Fitbit       | TSD        | -0.016                     | 0.024      | 0.511    | 0.026          |
|              | Wakeups    | 0.014                      | 0.033      | 0.672    | 0.011          |
| Withings     | TSD        | -0.013                     | 0.019      | 0.497    | 0.028          |
|              | Latency    | -0.272                     | 0.101      | 0.0158** | 0.297          |
|              | Efficiency | 0.003                      | 0.002      | 0.148    | 0.099          |
|              | Wakeups    | -0.0153                    | 0.0163     | 0.361    | 0.049          |
|              | REM        | -0.036                     | 0.071      | 0.617    | 0.015          |
| Oura         | TSD        | 0.036                      | 0.027      | 0.197    | 0.096          |
|              | Latency    | 0.138                      | 0.200      | 0.499    | 0.027          |
|              | Efficiency | 0.004                      | 0.004      | 0.332    | 0.055          |
|              | Wakeups    | 0.025                      | 0.018      | 0.184    | 0.101          |
|              | REM        | 0.010                      | 0.028      | 0.732    | 0.007          |
| Hexoskin     | TSD        | -0.028                     | 0.026      | 0.289    | 0.066          |
|              | Latency    | 0.113                      | 0.157      | 0.481    | 0.030          |
|              | Efficiency | -0.006                     | 0.009      | 0.527    | 0.024          |
|              | REM        | -0.103                     | 0.074      | 0.186    | 0.101          |
| SRSM         | TSD        | -0.022                     | 0.023      | 0.361    | 0.049          |
|              | Latency    | 0.197                      | 0.151      | 0.210    | 0.091          |
| Observations |            | 19                         |            |          |                |

Note: \*  $P < 0.1$ ; \*\*  $P < 0.05$ ; \*\*\*  $P < 0.01$ ; SRSM refers to self-reported sleep metrics.

## S8: Univariate analyses comparing evening cognitive scores to device data

|              |            | <b>Evening Cognitive Scores</b> |            |         |                |
|--------------|------------|---------------------------------|------------|---------|----------------|
| Device       | Feature    | Coefficient                     | Std. Error | P-Value | R <sup>2</sup> |
| Fitbit       | TSD        | -0.012                          | 0.023      | 0.61    | 0.017          |
|              | Wakeups    | 0.006                           | 0.032      | 0.857   | 0.002          |
| Withings     | TSD        | -0.016                          | 0.018      | 0.409   | 0.043          |
|              | Latency    | -0.271                          | 0.097      | 0.013** | 0.327          |
|              | Efficiency | 0.002                           | 0.002      | 0.194   | 0.103          |
|              | Wakeups    | -0.015                          | 0.016      | 0.378   | 0.049          |
|              | REM        | -0.041                          | 0.069      | 0.557   | 0.022          |
| Oura         | TSD        | 0.034                           | 0.026      | 0.221   | 0.092          |
|              | Latency    | 0.116                           | 0.196      | 0.563   | 0.021          |
|              | Efficiency | 0.004                           | 0.004      | 0.301   | 0.067          |
|              | Wakeups    | 0.021                           | 0.019      | 0.289   | 0.070          |
|              | REM        | 0.011                           | 0.028      | 0.713   | 0.009          |
| Hexoskin     | TSD        | -0.031                          | 0.025      | 0.235   | 0.087          |
|              | Latency    | 0.057                           | 0.156      | 0.718   | 0.008          |
|              | Efficiency | -0.002                          | 0.009      | 0.798   | 0.004          |
|              | REM        | -0.108                          | 0.077      | 0.180   | 0.109          |
| SRSM         | TSD        | -0.025                          | 0.022      | 0.273   | 0.075          |
|              | Latency    | 0.177                           | 0.152      | 0.261   | 0.078          |
| Observations |            | 18                              |            |         |                |

Note: \* P < 0.1; \*\* P < 0.05; \*\*\* P < 0.01; SRSM refers to self-reported sleep metrics.

## S9: Univariate analyses comparing morning cognitive scores to participant summary data

|                |      |             |            |         | <b>Morning Cognitive Scores</b> |  |  |  |
|----------------|------|-------------|------------|---------|---------------------------------|--|--|--|
| Feature        |      | Coefficient | Std. Error | P-Value | R <sup>2</sup>                  |  |  |  |
| PSQI           |      | -0.003      | 0.005      | 0.531   | 0.029                           |  |  |  |
| MEQ            |      | -0.001      | 0.002      | 0.529   | 0.029                           |  |  |  |
| Emotional      | Role | 0.0003      | 0.001      | 0.665   | 0.014                           |  |  |  |
| Limitations    |      |             |            |         |                                 |  |  |  |
| Energy         |      | 0.0003      | 0.001      | 0.700   | 0.011                           |  |  |  |
| General Health |      | -0.001      | 0.004      | 0.769   | 0.006                           |  |  |  |
| Physical       |      | 0.003       | 0.001      | 0.014** | 0.358                           |  |  |  |
| Social         |      | 0.002       | 0.001      | 0.170   | 0.130                           |  |  |  |

|              |       |       |        |       |
|--------------|-------|-------|--------|-------|
| Well-being   | 0.002 | 0.001 | 0.078* | 0.206 |
| Observations | 16    |       |        |       |

Note: \*  $P < 0.1$ ; \*\*  $P < 0.05$ ; \*\*\*  $P < 0.01$ .

S10: Univariate analyses comparing afternoon cognitive scores to participant summary data

| Feature                    | Afternoon Cognitive Score |            |          |                |
|----------------------------|---------------------------|------------|----------|----------------|
|                            | Coefficient               | Std. Error | P-Value  | R <sup>2</sup> |
| PSQI                       | -0.013                    | 0.007      | 0.083*   | 0.167          |
| MEQ                        | 0.005                     | 0.003      | 0.057*   | 0.197          |
| Emotional Role Limitations | 0.002                     | 0.001      | 0.005*** | 0.382          |
| Energy                     | 0.003                     | 0.001      | 0.018**  | 0.288          |
| General Health             | -0.002                    | 0.007      | 0.823    | 0.003          |
| Physical                   | 0.001                     | 0.330      | 0.745    | 0.006          |
| Social                     | 0.005                     | 0.001      | 0.004*** | 0.397          |
| Well-being                 | 0.004                     | 0.001      | 0.005*** | 0.379          |
| Observations               | 19                        |            |          |                |

Note: \*  $P < 0.1$ ; \*\*  $P < 0.05$ ; \*\*\*  $P < 0.01$ .

S11: Univariate analyses comparing evening cognitive scores to participant summary data

| Feature                    | Evening Cognitive Scores |            |          |                |
|----------------------------|--------------------------|------------|----------|----------------|
|                            | Coefficient              | Std. Error | P-Value  | R <sup>2</sup> |
| PSQI                       | -0.014                   | 0.007      | 0.057**  | 0.208          |
| MEQ                        | 0.004                    | 0.003      | 0.12     | 0.144          |
| Emotional Role Limitations | 0.002                    | 0.001      | 0.003*** | 0.438          |
| Energy                     | 0.003                    | 0.001      | 0.010*** | 0.345          |
| General Health             | 0.0003                   | 0.008      | 0.961    | 0.0001         |
| Physical                   | 0.001                    | 0.003      | 0.597    | 0.018          |
| Social                     | 0.005                    | 0.001      | 0.002*** | 0.463          |
| Well-being                 | 0.004                    | 0.001      | 0.001*** | 0.500          |
| Observations               | 18                       |            |          |                |

Note: \*  $P < 0.1$ ; \*\*  $P < 0.05$ ; \*\*\*  $P < 0.01$ .
